# Supplementary material for: Protective effect of biogenic polyphosphate nanoparticles fromSynechococcussp. PCC 7002 on dextran sodium sulphate-induced colitis in mice
Source: Royal Society of Chemistry journal article supplement (doi:10.1039/c8fo01861h), 2019-01-01

**Protective Effect of Biogenic Polyphosphate Nanoparticles from  
*Synechococcus* sp. PCC 7002 on Dextran Sodium Sulphate-Induced  
Colitis in Mice**

Guangxin Feng, Mingyong Zeng, Min Huang, Suqin Zhu, Wei Guo, Haohao Wu\*

*College of Food Science and Engineering, Ocean University of China, 5 Yushan  
Road, Qingdao, Shandong Province, 266003, China*

\* The author to whom correspondence should be addressed;

E-mail: [wuhaohao@ouc.edu.cn](mailto:wuhaohao@ouc.edu.cn); Tel.: +86-532-8203-2400.

**Figure caption**

**Figure S1.** Representative TEM image of the obtained BPNPs.

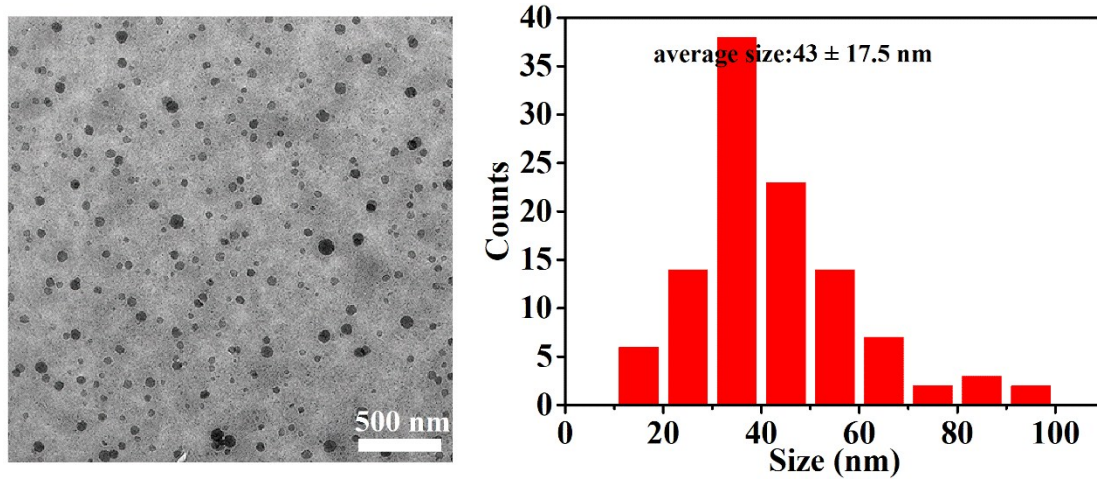

Supplement: c8fo01861h1.pdf [file c8fo01861h1.pdf]
